# Supplementary material
Source: PubMed Central journal article supplement (PMC1986630)

# Migration scenario used for simulations

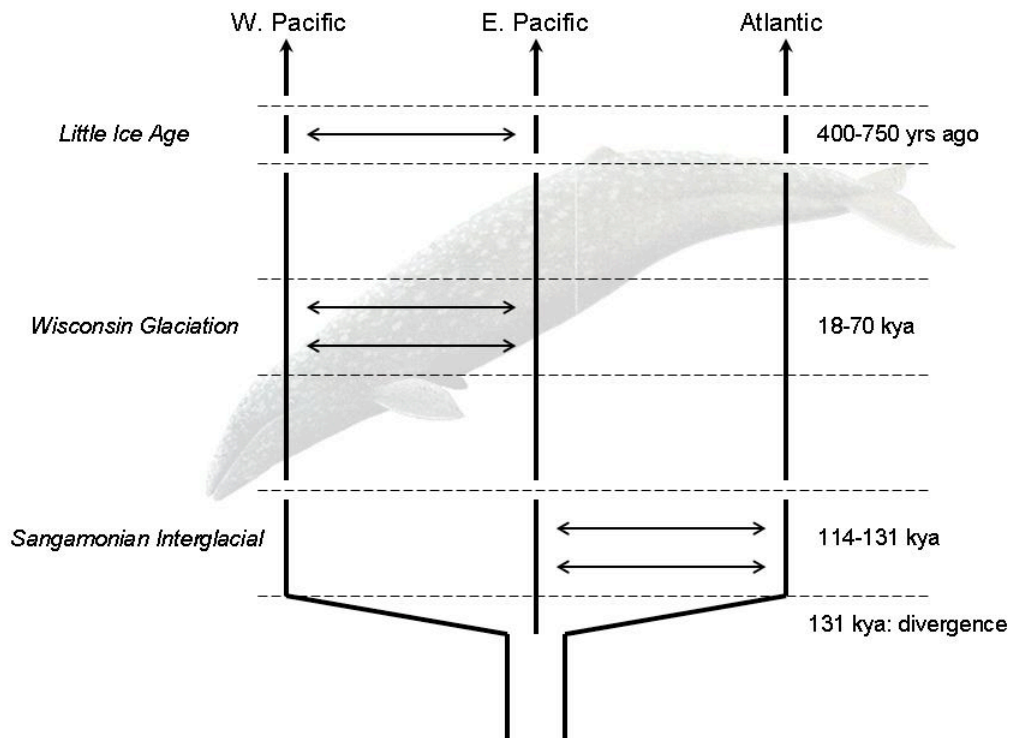

Supplement: pnas_0706056104_1.pdf [file pnas_0706056104_1.pdf]

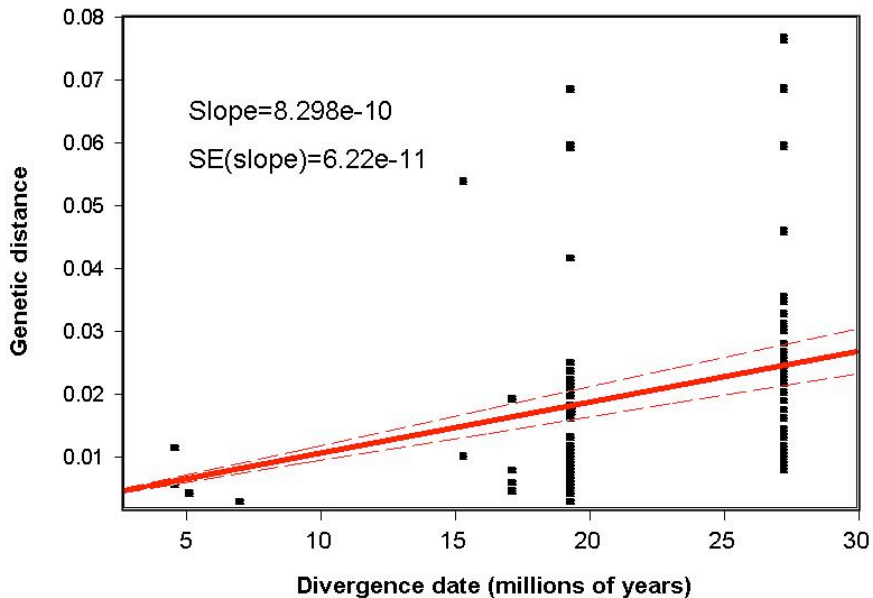

Supplement: pnas_0706056104_3.pdf [file pnas_0706056104_3.pdf]
